# Supplementary material
Source: publisher figshare collection journal article supplement (https://geolsoc.figshare.com/articles/dataset/_/3453686)
Supplement: Supplementary file 2 [file 1]

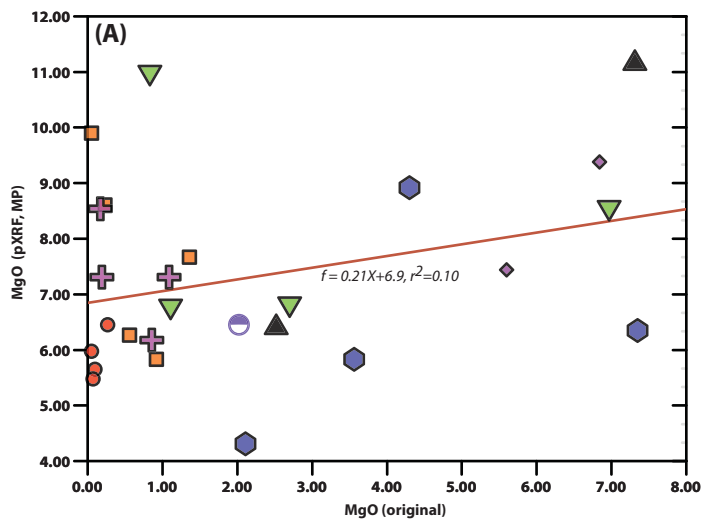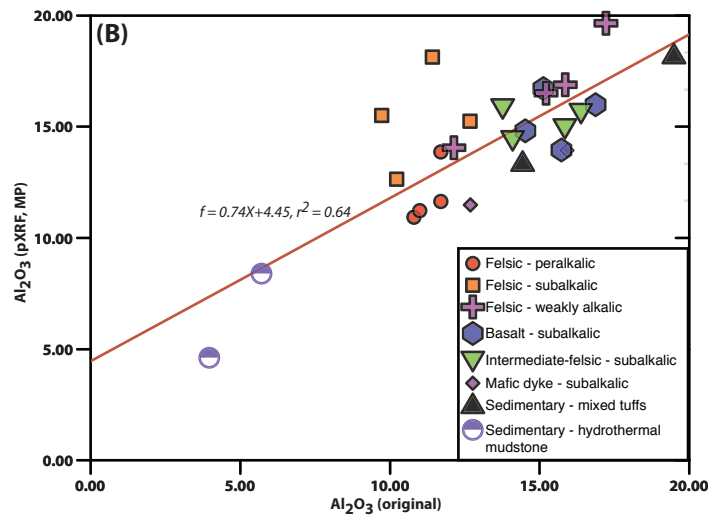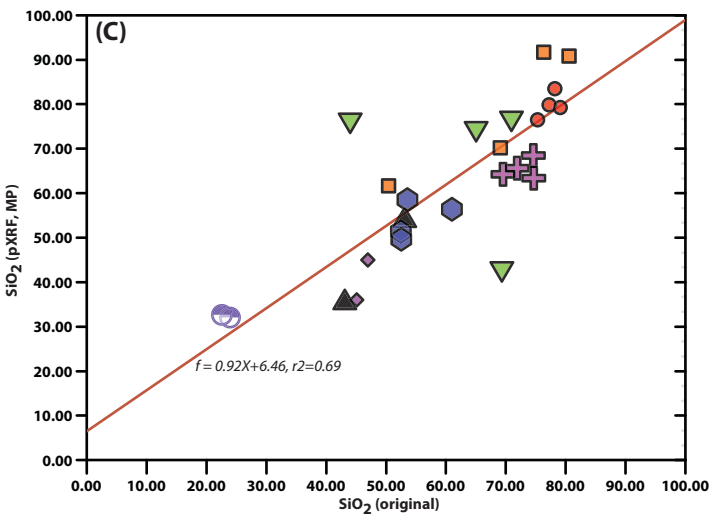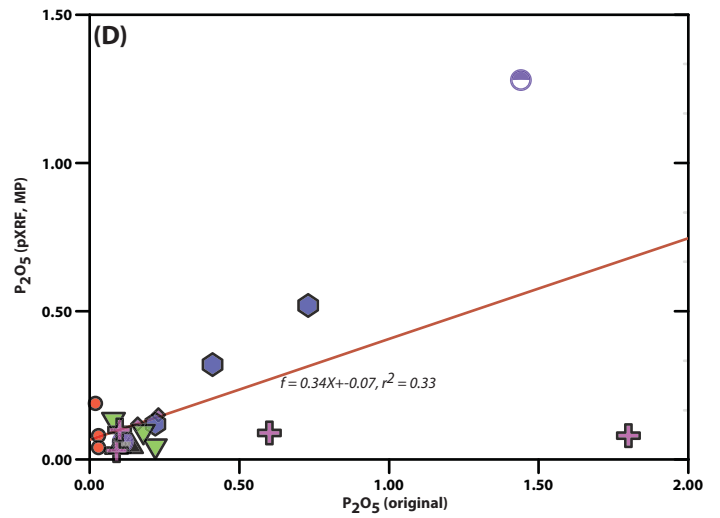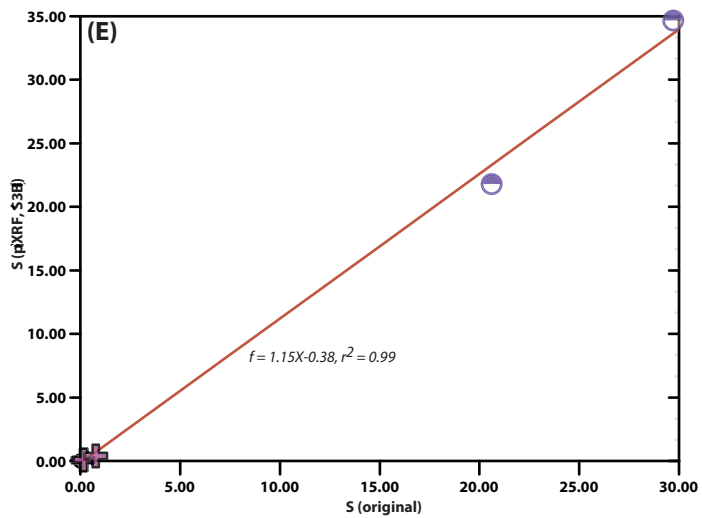

Appendix 3. Piercey and Devine.

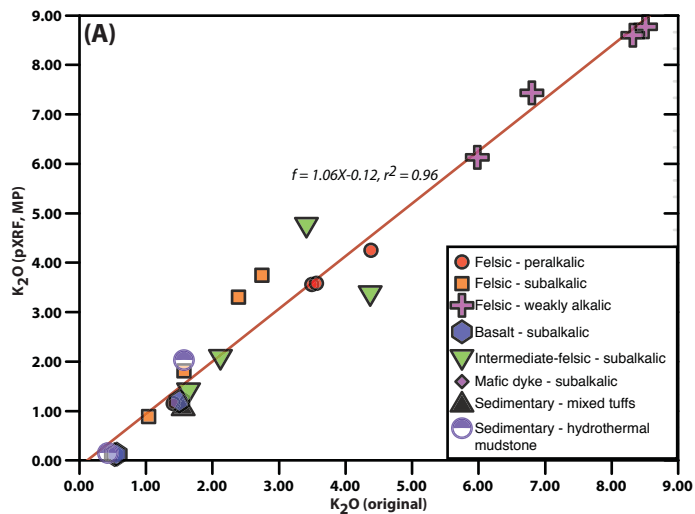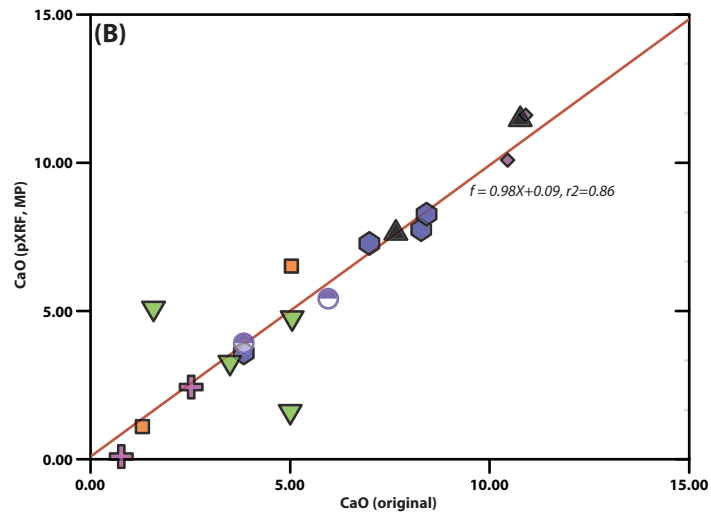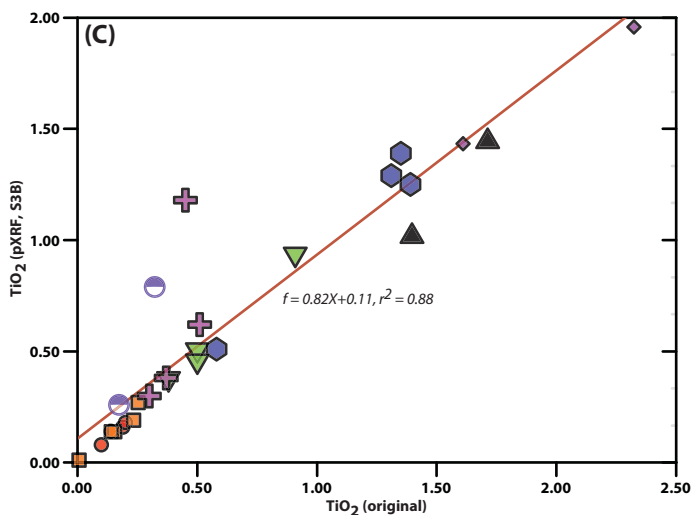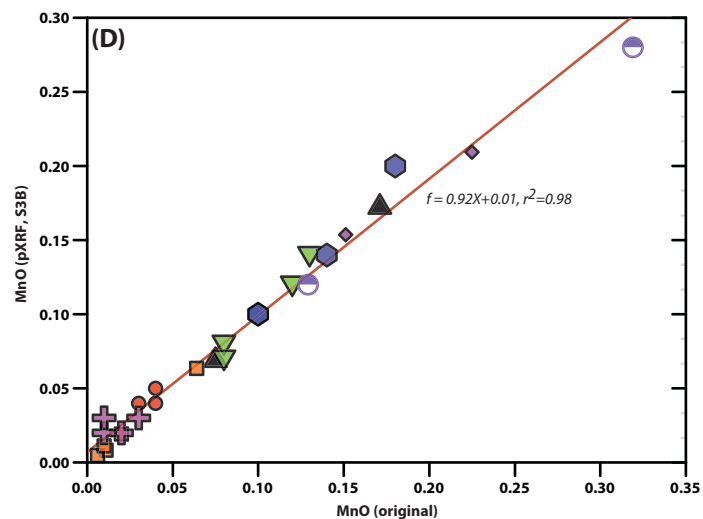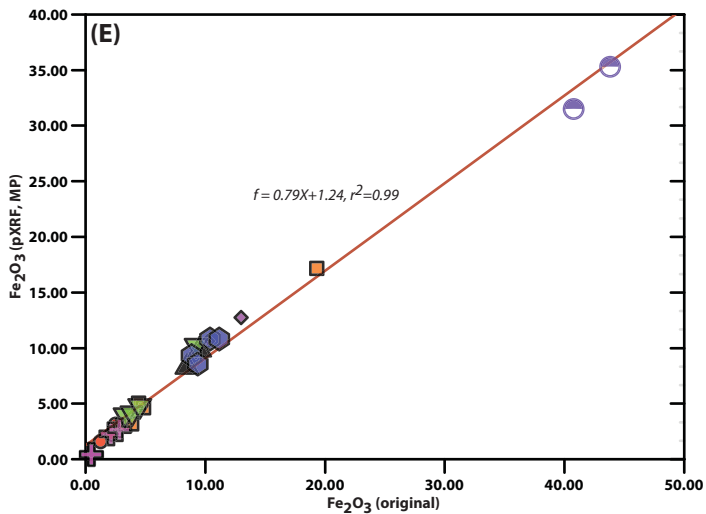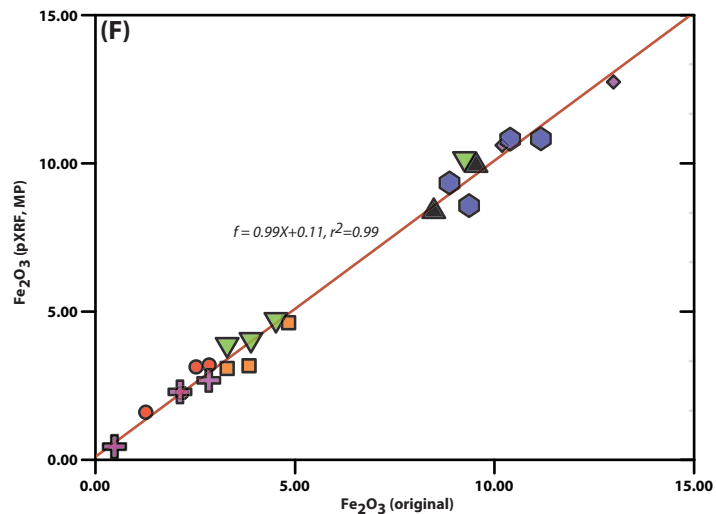

Appendix 4. Piercey and Devine.

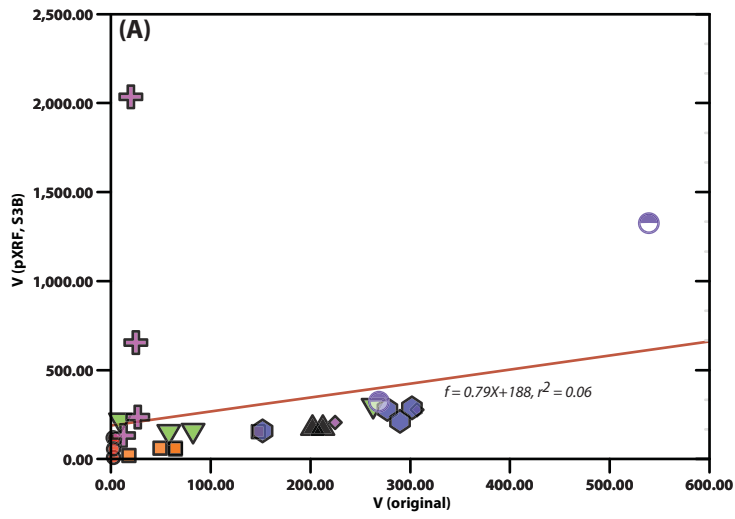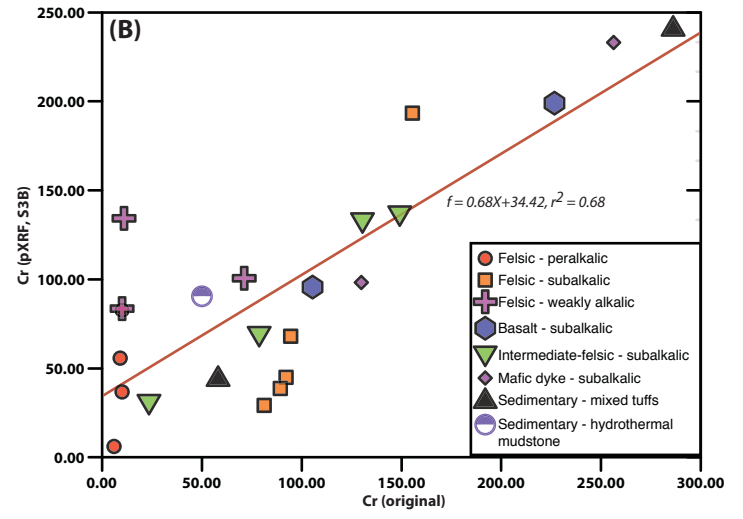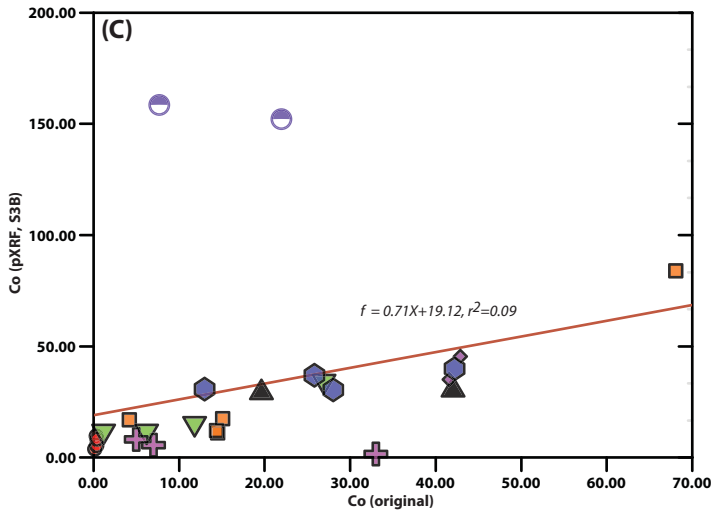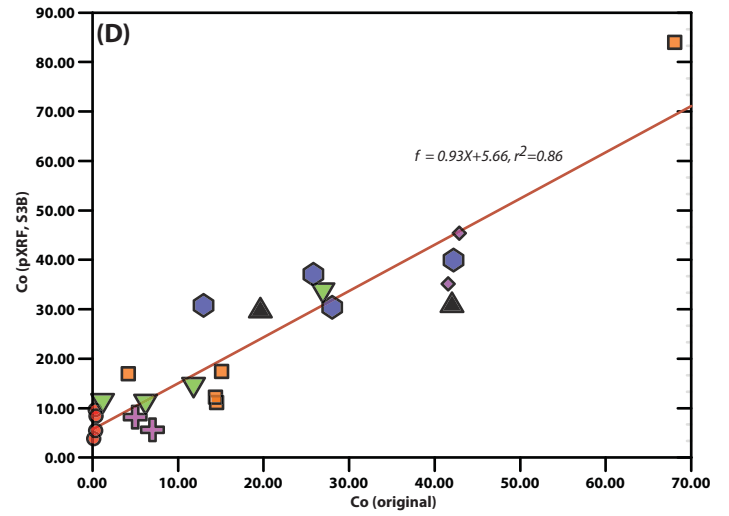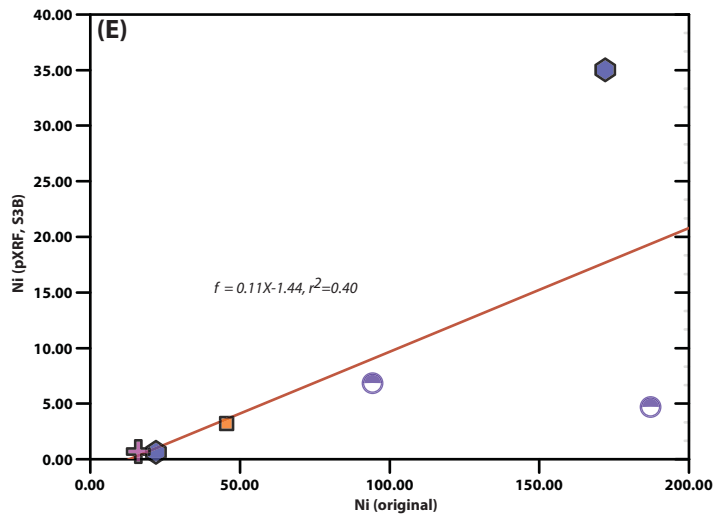

Appendix 5. Piercey and Devine.

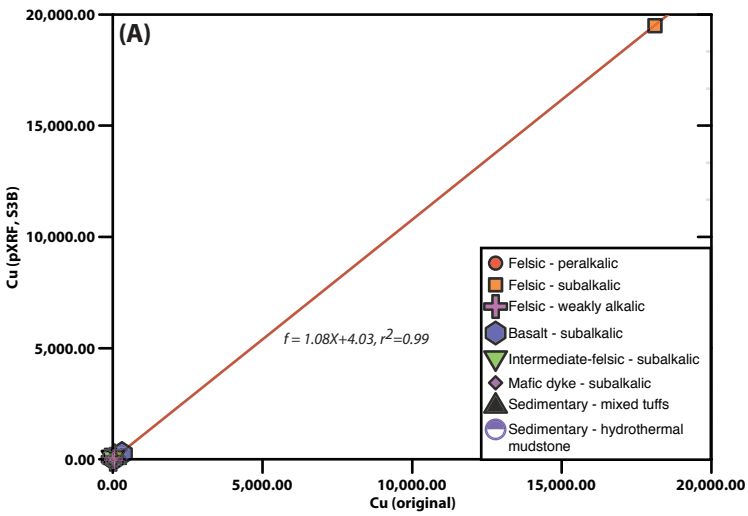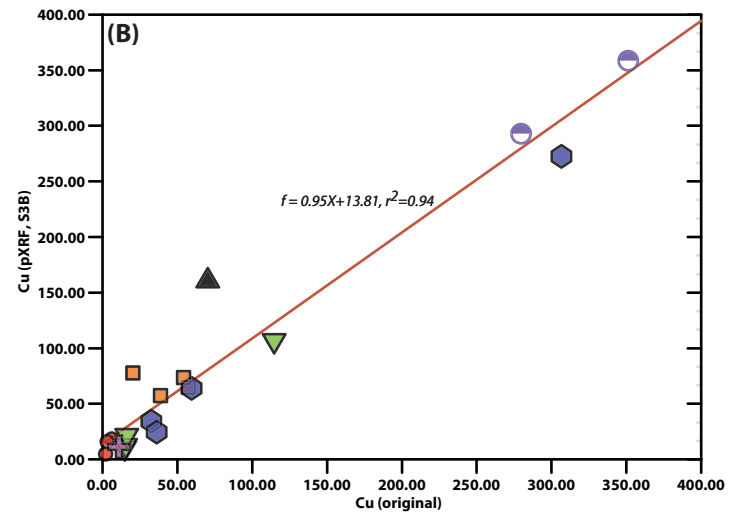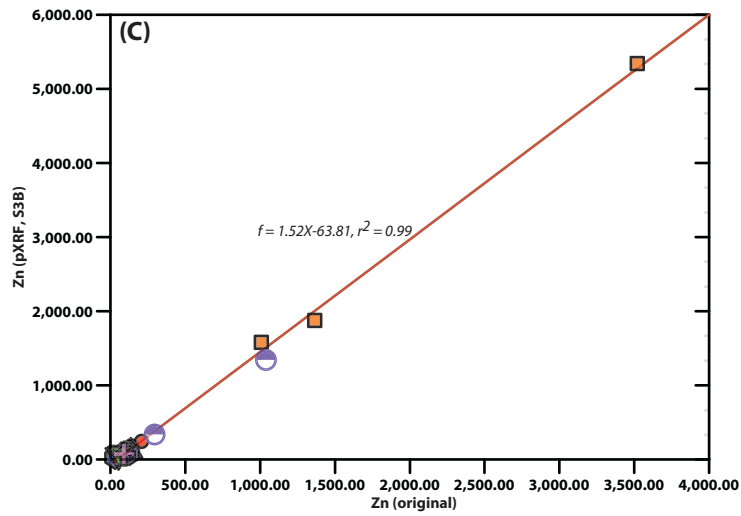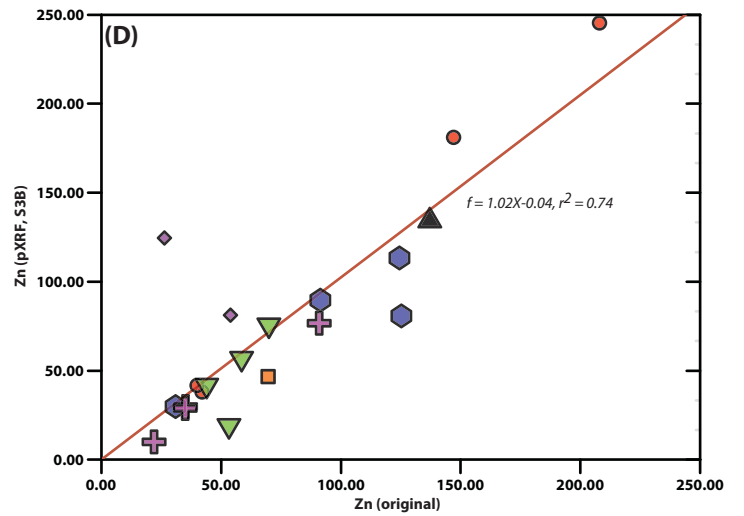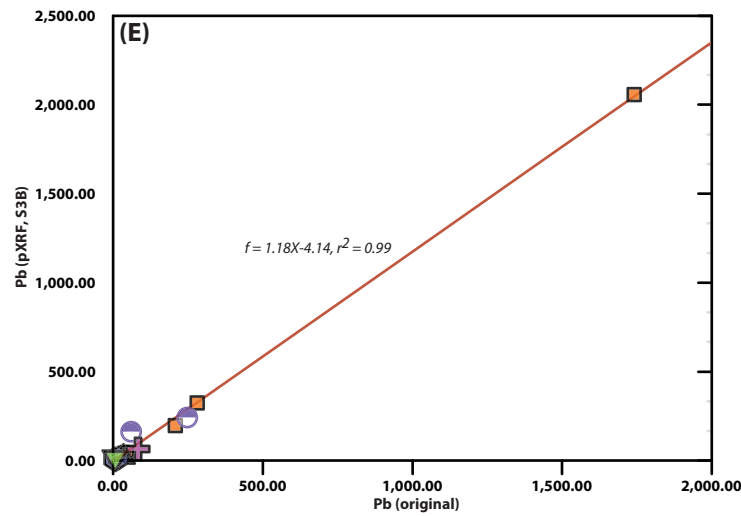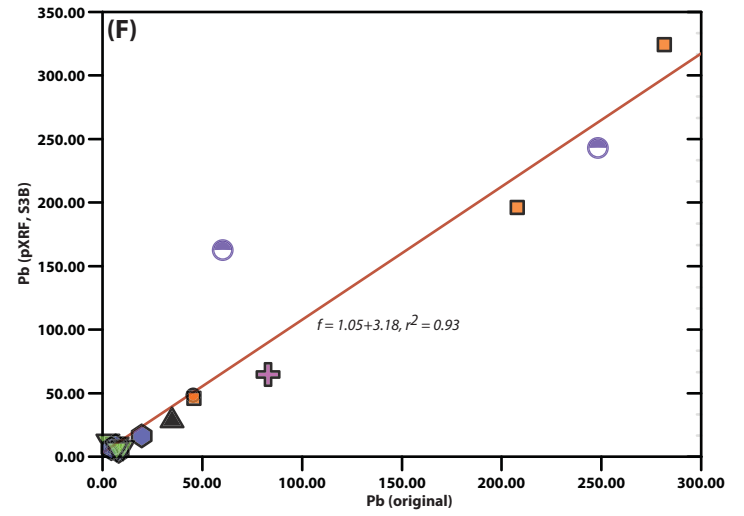

Appendix 6. Piercey and Devine.

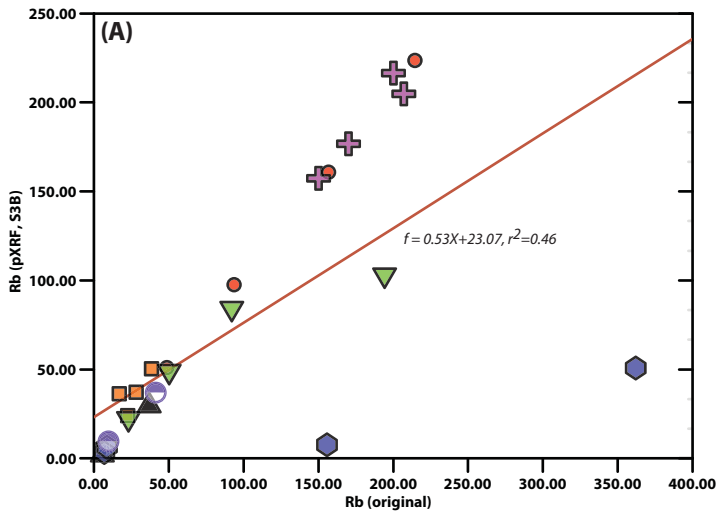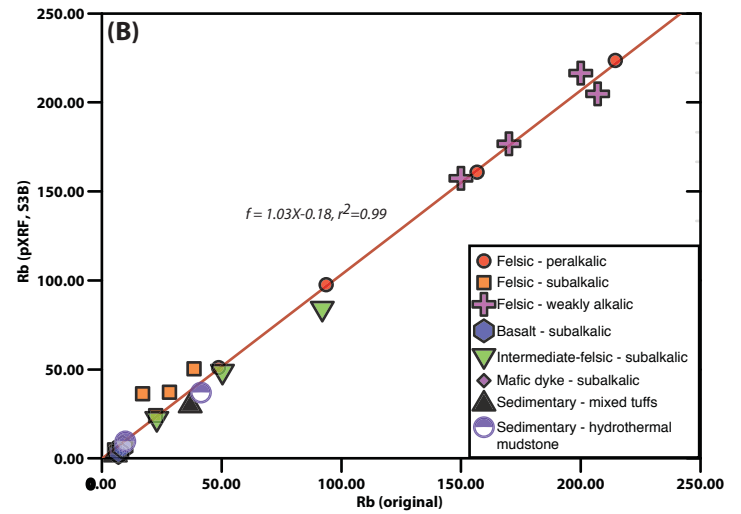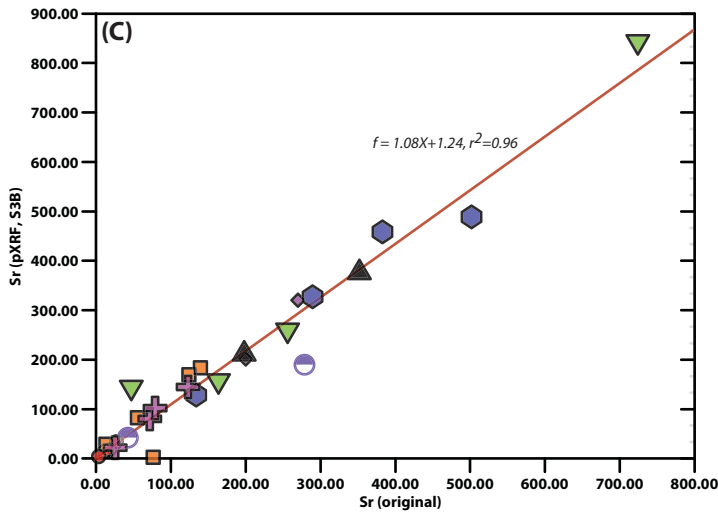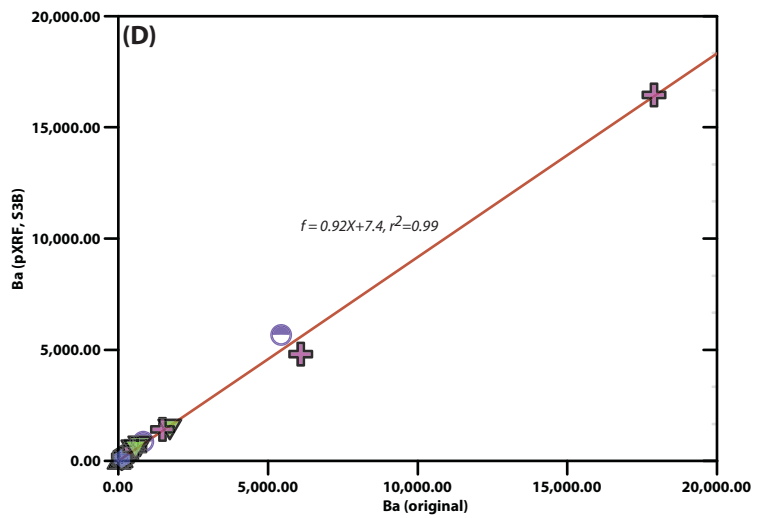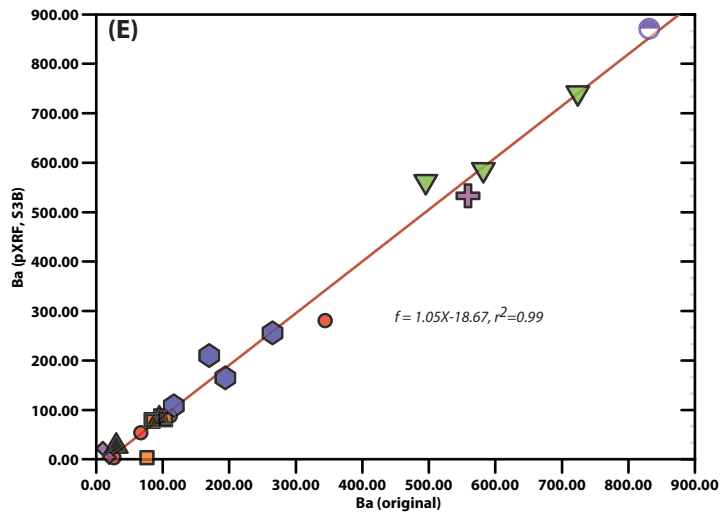

Appendix 7. Piercey and Devine.

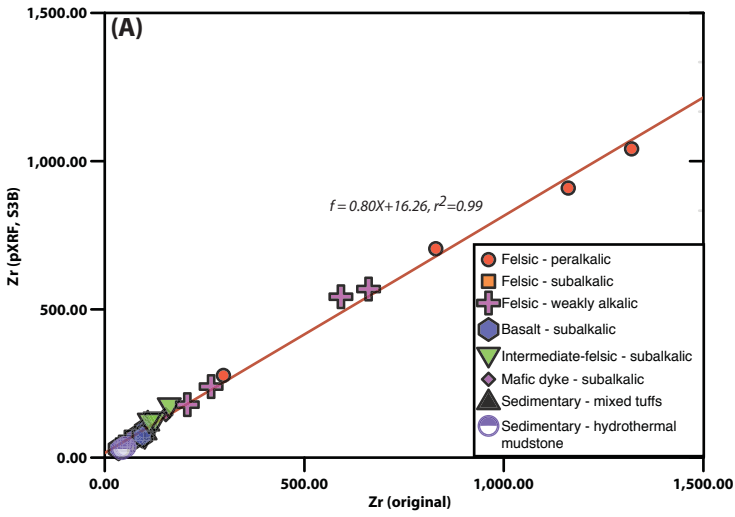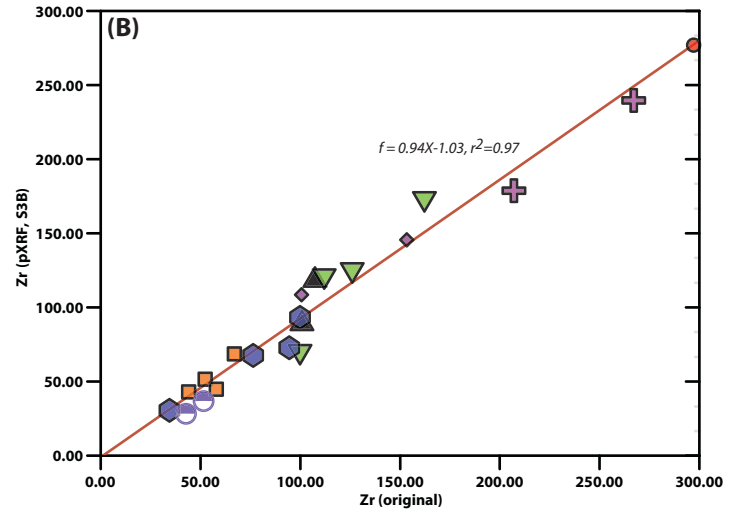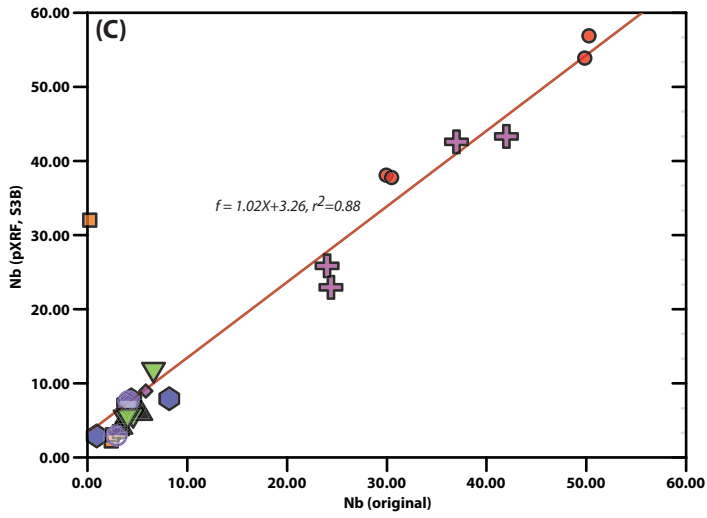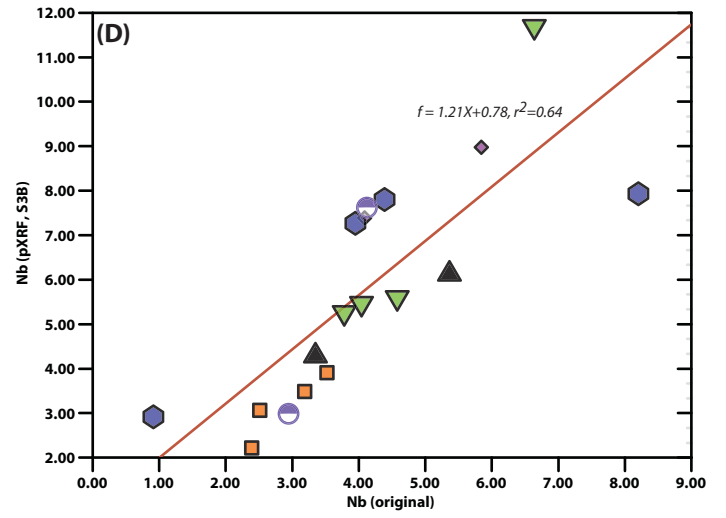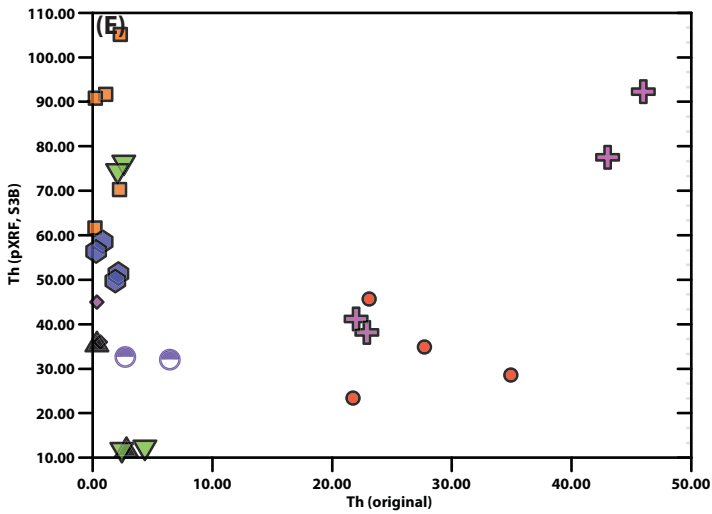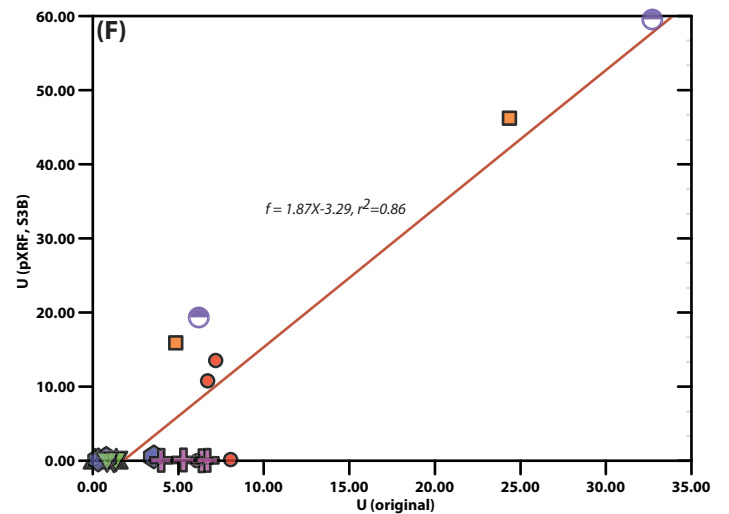

Appendix 8. *Piercey and Devine.*

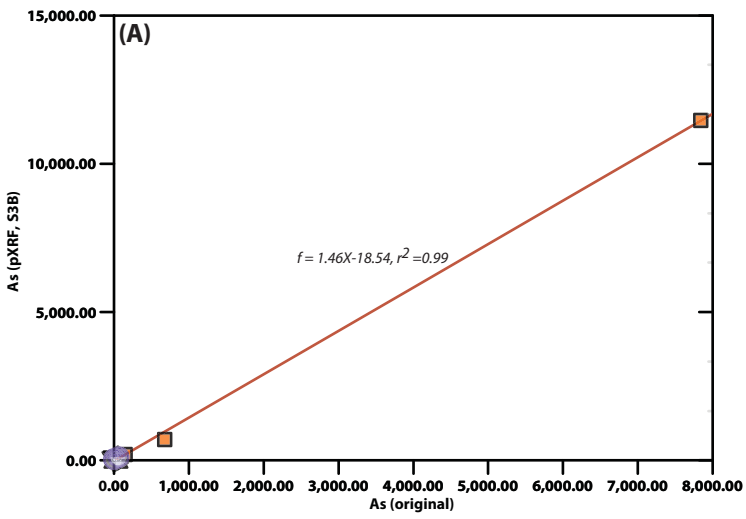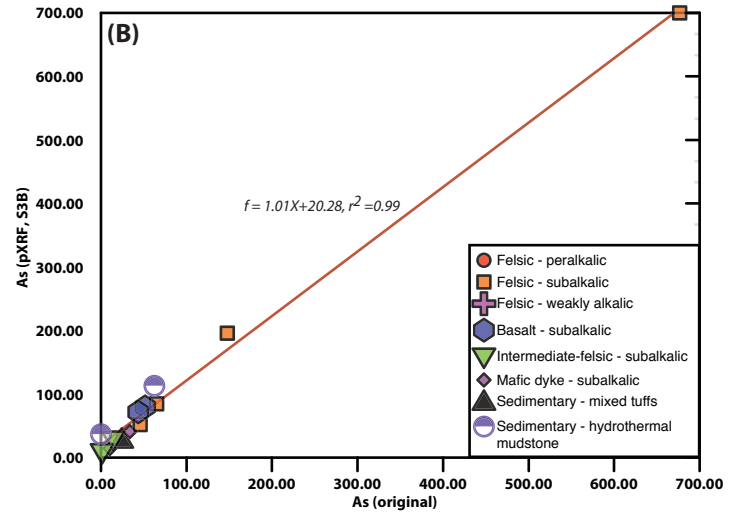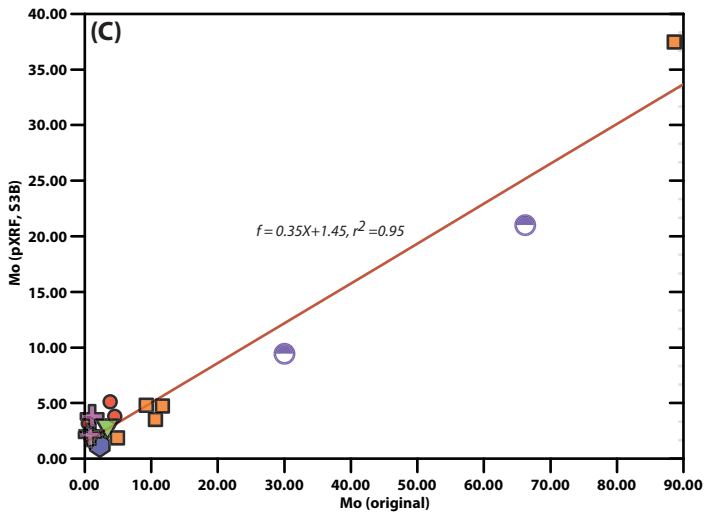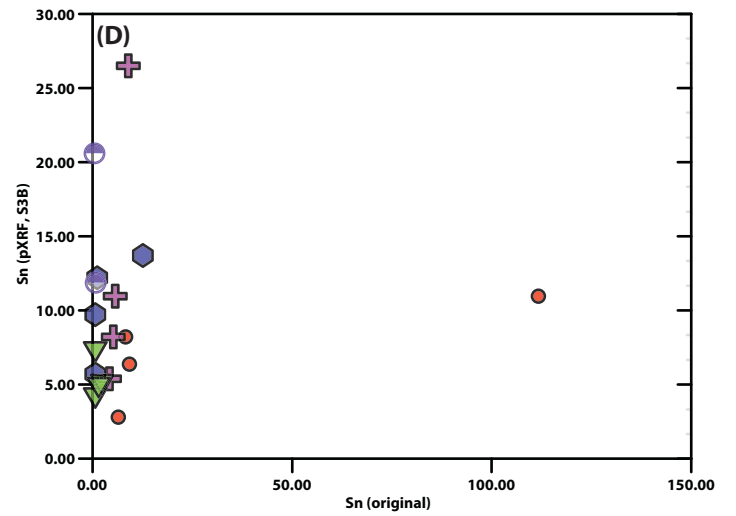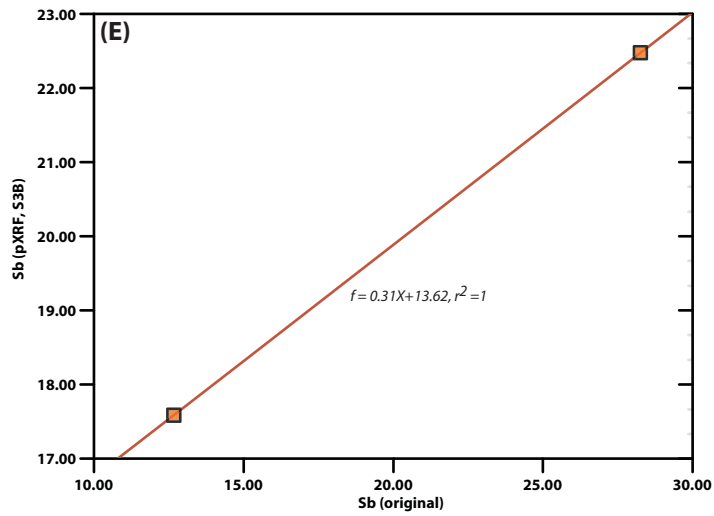

Appendix 9. Piercey and Devine.
